# Supplementary material
Source: HighWire-hosted journal article supplement (http://jpet.aspetjournals.org/highwire/filestream/139918/field_highwire_adjunct_files/0/239590supplfigures.pdf)
Supplement: 239590supplfigures.pdf [file 239590supplfigures.pdf]

## **Supplementary Information**

**The Journal of Experimental Pharmacology and Experimental Therapeutics**

### **Pharmacologic Characterization of AMG8379, a Potent and Selective Small Molecule Sulfonamide Antagonist of the Voltage-Gated Sodium Channel Na<sub>v</sub>1.7**

Thomas Kornecook, Ruoyuan Yin, Stephen Altmann, Xuhai Be, Virginia Berry, Christopher P. Ilch, Michael Jarosh, Danielle Johnson, Josie H. Lee, Sonya G. Lehto, Joseph Ligutti, Dong Liu, Jason Luther, David Matson, Danny Ortuno, John Roberts, Kristin Taborn, Jinti Wang, Matthew M. Weiss, Violeta Yu, Dawn X. D. Zhu, Robert T. Fremeau Jr., and Bryan D. Moyer

## AMG8379

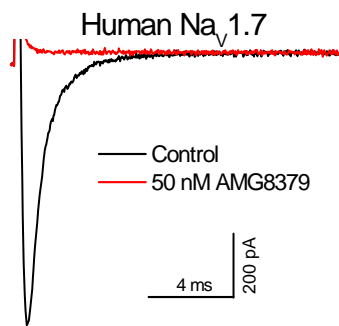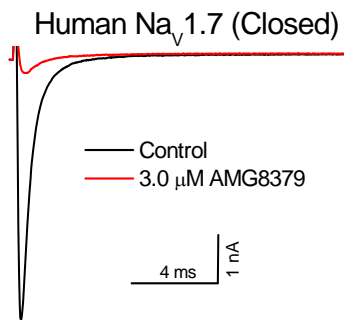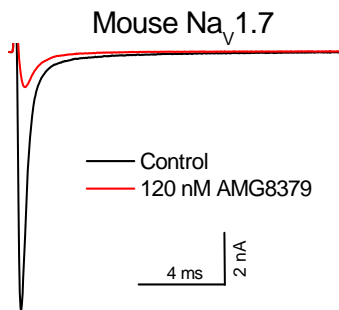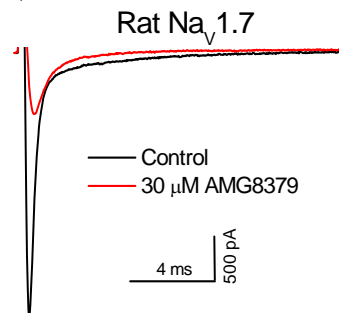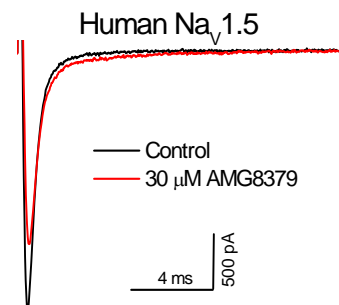

## AMG8380

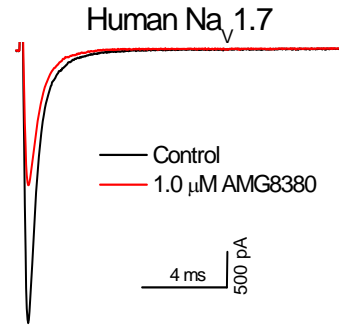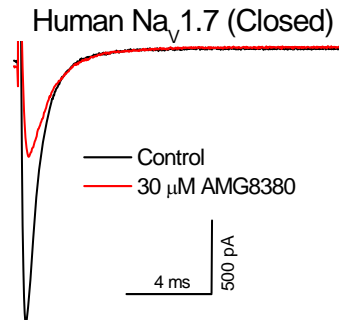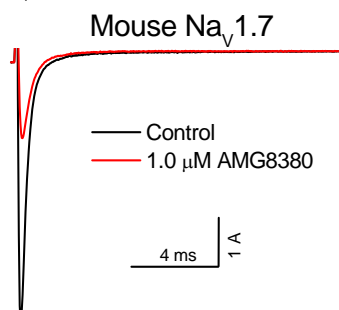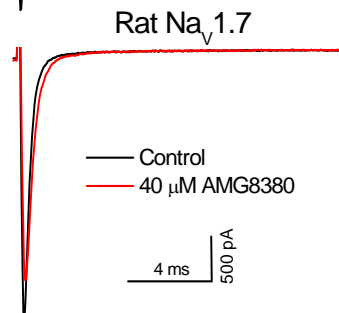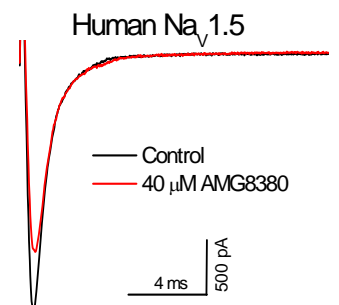

**Supplementary Figure 1.** Representative current traces illustrating potent and selective block of hNa<sub>v</sub>1.7 and mNa<sub>v</sub>1.7 but not rNa<sub>v</sub>1.7 or hNa<sub>v</sub>1.5 in a partially inactivated state or hNa<sub>v</sub>1.7 channels in the resting/closed state by AMG8379 compared to AMG8380 in heterologous cells. Patch clamp recordings were from the PatchXpress platform. Traces show currents for the indicated channel before (black) and after (red) compound addition at the indicated concentrations.

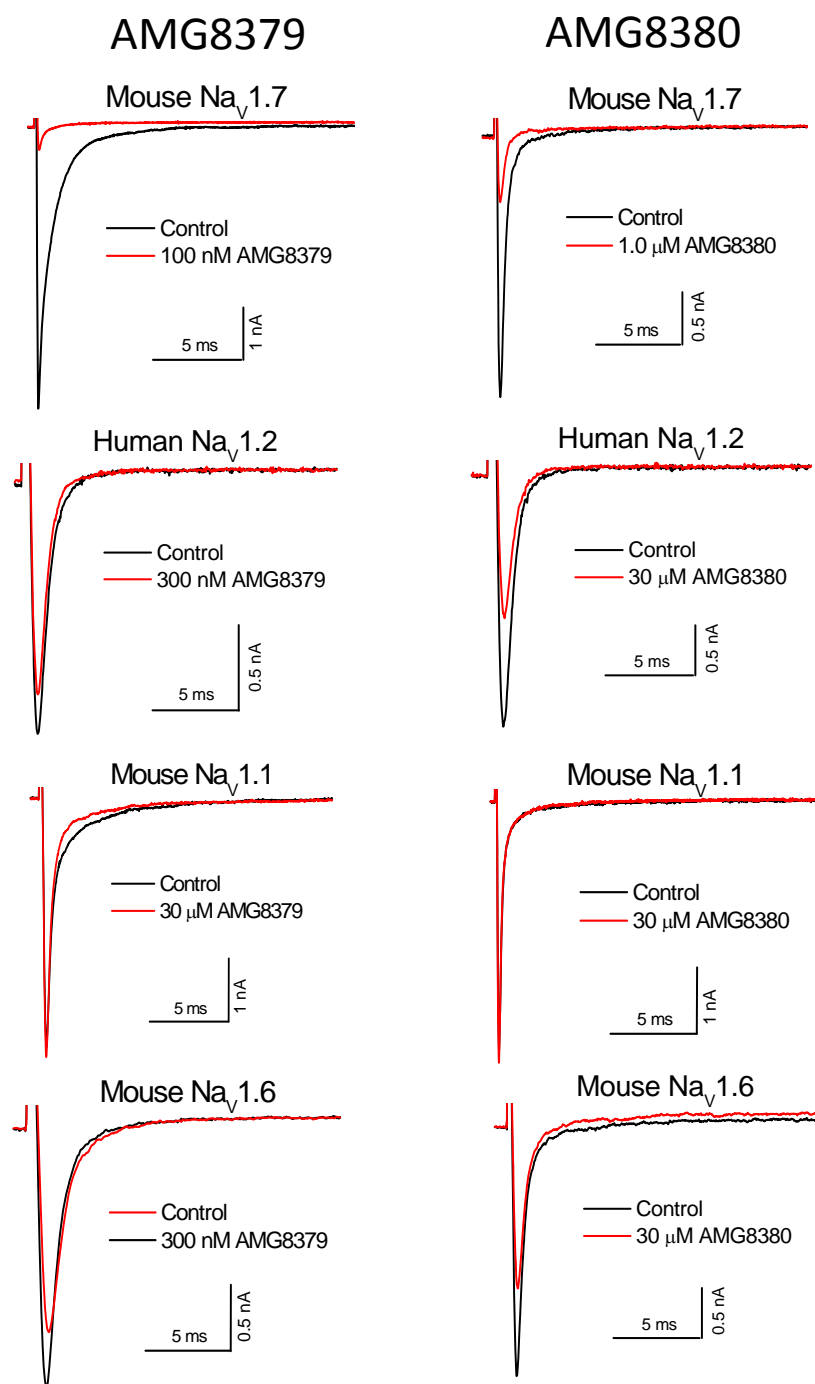

**Supplementary Figure 2.** Representative current traces illustrating potent and selective block of mNa<sub>v</sub>1.7, but not hNa<sub>v</sub>1.2, mNa<sub>v</sub>1.1, and mNa<sub>v</sub>1.6, channels by AMG8379 compared to AMG8380 in heterologous cells. Manual patch clamp electrophysiology recordings used the IonWorks Quattro voltage protocol. Traces show currents for the indicated channel before (black) and after (red) compound addition at the indicated concentrations.
